# Supplementary material
Source: PubMed Central journal article supplement (PMC4326889)

## Supplementary Figures:

**Figure S1.** (A, B) Cells were grown in 2% glucose SDC medium until day2. Then cells were equally split into two flasks and one culture was buffered with 0.1 M MES and NaOH to pH 6. Samples were collected 8, 24 and 48 hours after buffering (n=3). \*, p<0.05. (C) The pH of the cultures during chronological aging. (D) Extracellular ethanol concentrations of wild type, *ady2Δ*, *pdh6Δ* and *acs1Δ* mutants.

**Figure S2.** (A, B) Wild type (DBY746) growing in 2% glucose SDC with 4X or 1X HIS, URA, LEU, TRP or 1X LEU with 4X HIS, URA, TRP. Extracellular acetate and ethanol concentration normalized to cell numbers (n=3). (C) The extracellular acetate concentration of BY4741 wild type cells grown in SDC media with 4X and 8X LEU (n=4). (D) Chronological survival of *tor1Δ* and *sch9Δ* mutant cells prototrophic for LEU2 gene in SDC –leucine media.

**Figure S3.** (A, B) Wild type and *sch9Δ* mutant cells grown in 2% glucose SDC until day 3 and then washed 3 times and switched to 40mM MES buffer (pH 3.7) or buffer with physiological levels of ethanol (0.8%) or acetic acid (50mM). Oxygen consumption were monitored 3 and 24 hours after the switch (N=4-8) (C) O<sub>2</sub> consumption of wild type (BY4741) and *sch9Δ* mutants during chronological aging (n=2-5). (D) The *sch9Δ* mutant is treated with NaCN (0.25mM) on day1, then every other day until day7. Acetic acid concentration in cultures was monitored every other day. (E, F) Extracellular acetate and ethanol in the cultures of *coq* mutants on days 3 and 7 (n=3)

**Figure S4.** (A) Chronological survival of wild type cells in media limited in leucine. (B) Chronological survival of *bat1Δ bat2Δ* double mutants in standard SDC media.

Figure S1

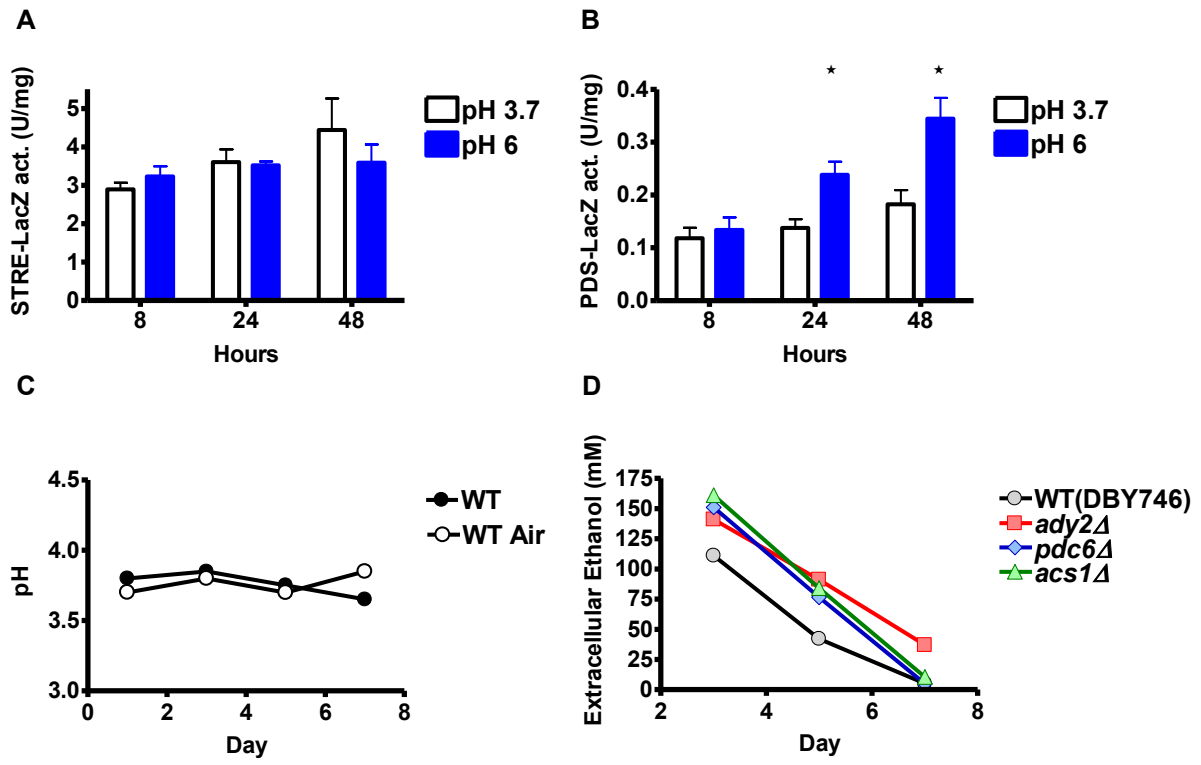

Figure S2

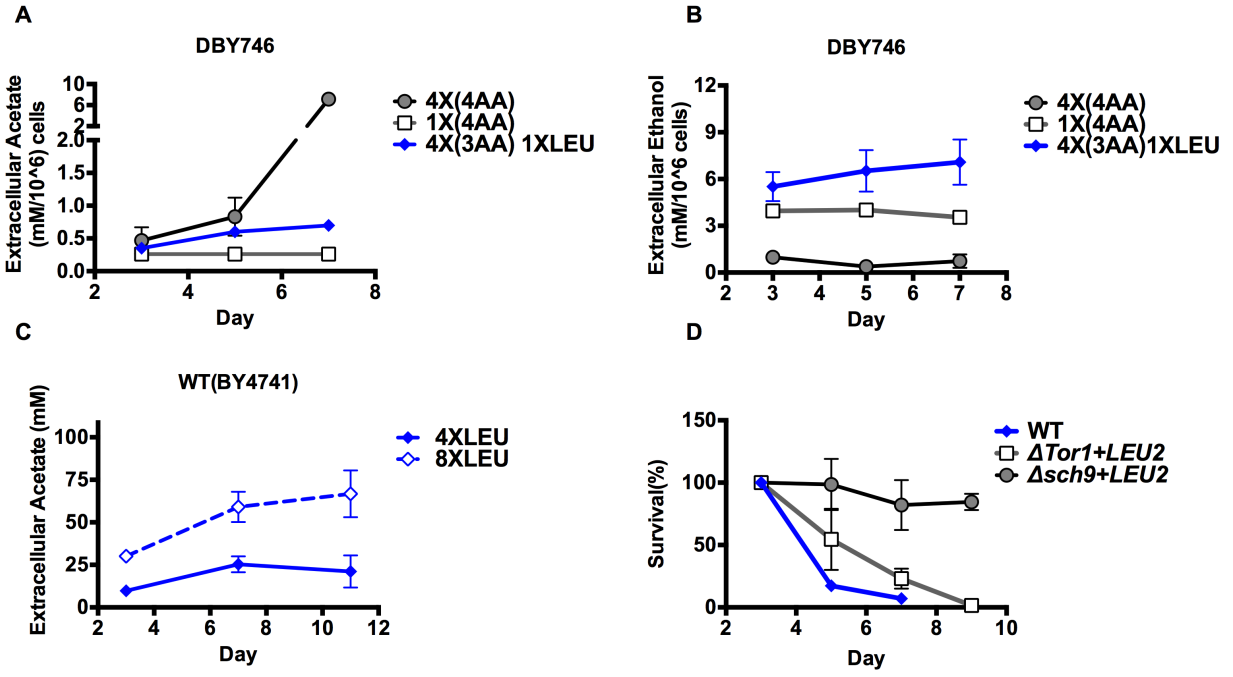

Figure S3

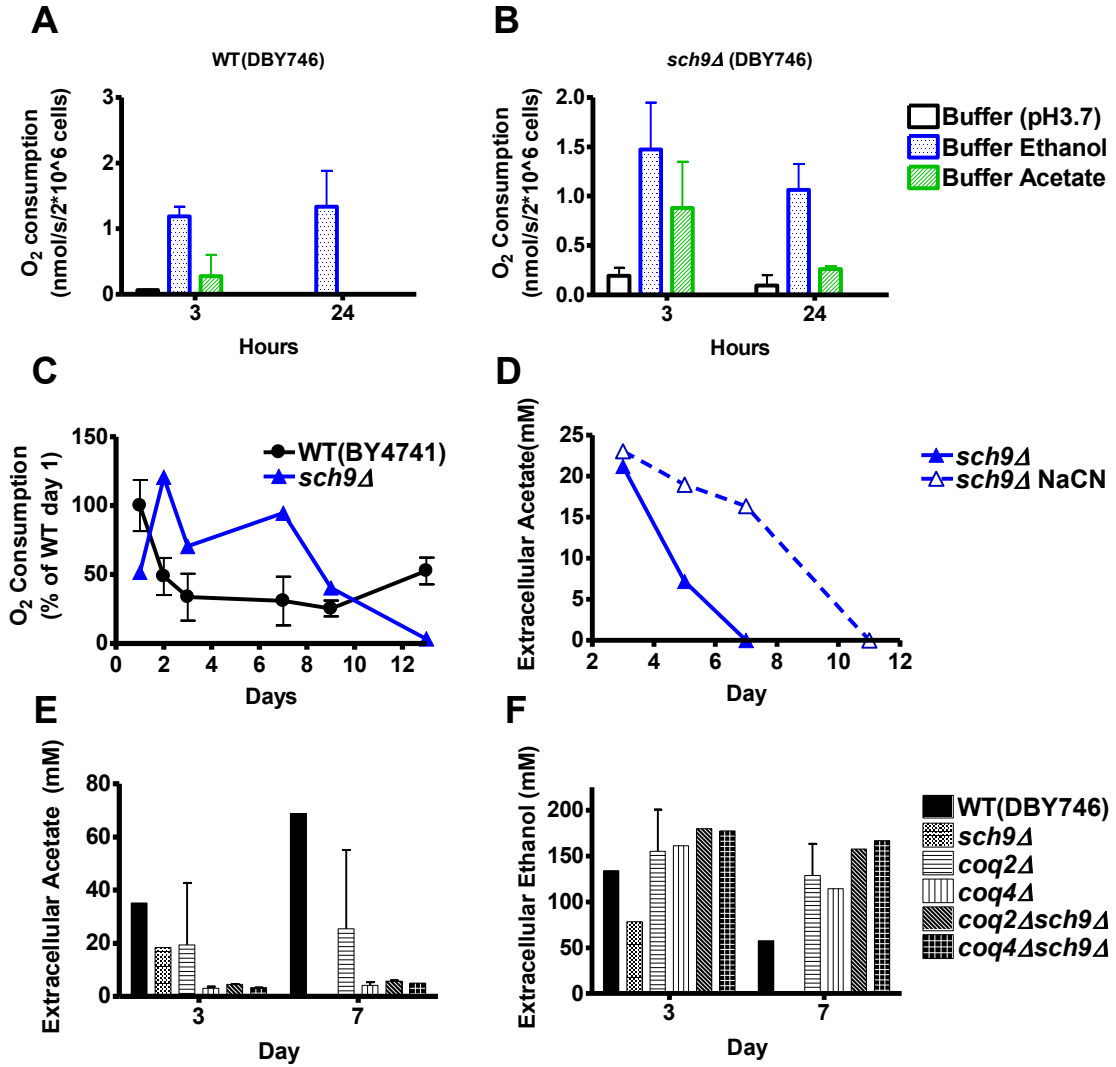

Figure S4

A

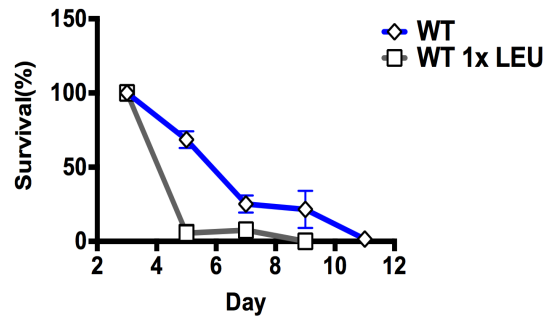

B

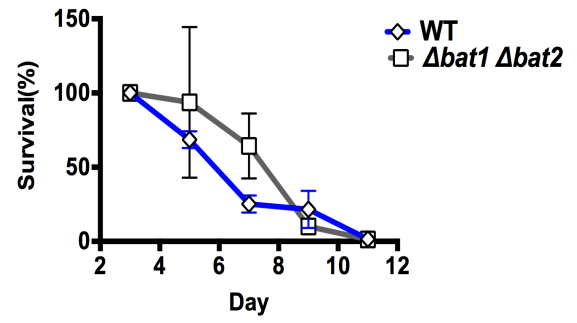

Supplement: acel0013-0457-sd1.pdf [file acel0013-0457-sd1.pdf]
